# Supplementary material
Source: PubMed Central journal article supplement (PMC3318331)
Supplement: supp_56.4.1698_FigS1.pdf [file supp_56.4.1698_FigS1.pdf]

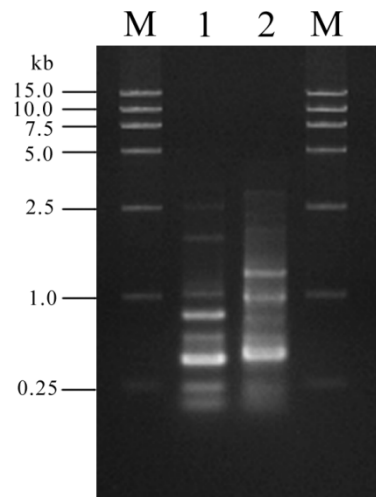

**Figure S1.** REP-PCR profiles of two *Acinetobacter lwoffii* isolates. M: DL15000 DNA marker; lane 1: *Acinetobacter lwoffii* 10621 harboring pNDM-BJ01; lane 2: *Acinetobacter lwoffii* 10659 harboring pNDM-BJ02.
