# Supplementary material
Source: PubMed Central journal article supplement (PMC3318331)
Supplement: supp_56.4.1698_TableS1.pdf [file supp_56.4.1698_TableS1.pdf]

Table S1 Primers used for pNDM-BJ01 structure confirmation as well as for pNDM-BJ02 sequencing.

| Name           | Sequence                                      | Position in pNDM-BJ01      | Product size (bp) |
|----------------|-----------------------------------------------|----------------------------|-------------------|
| PN1F<br>PN1R   | ATTCAGCAGTAACACTTCCT<br>CCAATAACCTCGCCTAGTC   | 46740-46759<br>3700-3718   | 4.523             |
| PN2F<br>PN2R   | TAGATTCGATTCACGGCATA<br>CTTCAACACGAGTCTCAGT   | 3291-3310<br>7527-7545     | 4.253             |
| PN3F<br>PN3R   | GGAGACCATAGAACTTACCTAA<br>GACGGCTATTACCTGTACC | 7488-7509<br>11739-11757   | 4.27              |
| PN4F<br>PN4R   | CAATTCCTTGCGGTAGGT<br>TGCGTAGCCATTTCTCAC      | 11620-11637<br>16262-16279 | 4.66              |
| PN5F<br>PN5R   | CATCGACATCACCACTG<br>CGTCTTTGTAGCCTTTATCTC    | 16001-16018<br>20204-20224 | 4.224             |
| PN6F<br>PN6R   | TCAGGATTCACCCACCAT<br>GGCTCAAGACTACAACGATA    | 20068-20085<br>24175-24194 | 4.127             |
| PN7F<br>PN7R   | GCGTTCAGCCATGTTGTT<br>GCGGTATGCCTGTTCTTA      | 24026-24043<br>28509-28526 | 4.501             |
| PN8F<br>PN8R   | CGAGAATCAGCAACACAAG<br>CGCTACAAGTCTGGAATCA    | 28409-28427<br>32835-32853 | 4.445             |
| PN9F<br>PN9R   | ATCTACGATCTTGCCTTGTT<br>CTTGTTCTGACGAGCCTAA   | 32536-32555<br>36732-36750 | 4.215             |
| PN10F<br>PN10R | AATGTCAGGCTTAGAAGTGA<br>TAGGCGTTCAGACCGTAA    | 36352-36731<br>40662-40679 | 4.328             |
| PN11F<br>PN11R | AATGTGGTCTGCGGTGTA<br>GCCTGCTGTAACCTTCTCAA    | 42521-40538<br>44950-44968 | 4.448             |
| PN12F<br>PN12R | GTTATGAAGAACGCCAACAA<br>GATTCCTCAATACCTACAAGC | 44638-44657<br>1437-1457   | 4.094             |
