# Supplementary material
Source: PubMed Central journal article supplement (PMC3318331)
Supplement: supp_56.4.1698_TableS2.pdf [file supp_56.4.1698_TableS2.pdf]

Table S2. ORFs in plasmid pNDM-BJ01 and the gene homologies in GenBank

| ORF No.       | Location (start-stop) | Size (aa.) | Best match (accession no.)                                                           | Organism                                  | Similarity (%) |
|---------------|-----------------------|------------|--------------------------------------------------------------------------------------|-------------------------------------------|----------------|
| pNDM-BJ01_1   | 454-3444              | 996        | putative MobA/MobL protein (ZP_05359481)                                             | <i>Acinetobacter radioresistens</i> SK82  | 886/972 (91%)  |
| pNDM- BJ01_2  | 3459-4703             | 414        | hypothetical protein (YP_974073)                                                     | <i>Acidovorax</i> sp. JS42                | 230/381 (60%)  |
| pNDM- BJ01_3  | 4714-5166             | 150        | predicted protein (ZP_06073950)                                                      | <i>Acinetobacter radioresistens</i> SH164 | 67/79 (85%)    |
| pNDM- BJ01_4  | 5569-5288             | 93         | hypothetical protein (YP_004111389)                                                  | <i>Desulfurispirillum indicum</i> S5      | 20/28 (71%)    |
| pNDM- BJ01_5  | 5761-6078             | 105        | transposase IS3/IS911 family protein (ZP_06067871)                                   | <i>Acinetobacter junii</i> SH205          | 105/105 (100%) |
| pNDM- BJ01_6  | 6189-6905             | 238        | transposase insB (ADX04036)                                                          | <i>Acinetobacter baumannii</i> 1656-2     | 238/238 (100%) |
| pNDM- BJ01_7  | 7011-7790             | 259        | aminoglycoside 3'-phosphotransferase (ZP_07238512)                                   | <i>Acinetobacter baumannii</i> AB058      | 257/259 (99%)  |
| pNDM- BJ01_8  | 7942-8967             | 341        | IS30 family transposase ISAbA125 (AEH43777)                                          | <i>Escherichia coli</i>                   | 341/341 (100%) |
| pNDM- BJ01_9  | 9068-9880             | 270        | New Delhi metallo-beta-lactamase-1 (ADP20459)                                        | <i>Escherichia coli</i>                   | 270/270 (100%) |
| pNDM- BJ01_10 | 9884-10249            | 121        | bleomycin resistance protein (AEH43775)                                              | <i>Escherichia coli</i>                   | 121/121 (100%) |
| pNDM- BJ01_11 | 10254-10892           | 212        | phosphoribosylanthranilate isomerase (ADY00042)                                      | <i>Escherichia coli</i>                   | 196/200 (98%)  |
| pNDM- BJ01_12 | 10903-11934           | 343        | tat twin-arginine translocation pathway signal sequence domain protein (ZP_08267023) | <i>Brevundimonas diminuta</i> ATCC 11568  | 163/188 (87%)  |
| pNDM- BJ01_13 | 12346-11939           | 135        | periplasmic divalent cation tolerance protein (YP_003374846)                         | <i>Xanthomonas albilineans</i> GPE PC73   | 76/100 (76%)   |
| pNDM- BJ01_14 | 12462-12752           | 96         | chaperonin Cpn10 (YP_004145503)                                                      | <i>Pseudoxanthomonas suwonensis</i> 11-1  | 90/96 (94%)    |
| pNDM- BJ01_15 | 12808-14448           | 546        | chaperonin GroEL (YP_001481444)                                                      | <i>Escherichia coli</i> APEC O1           | 515/533 (97%)  |
| pNDM- BJ01_16 | 14967-16166           | 399        | transposase InsE (YP_001481445)                                                      | <i>Escherichia coli</i> APEC O1           | 380/388 (98%)  |
| pNDM- BJ01_17 | 16954-17979           | 341        | IS30 family transposase ISAbA125 (ZP_08442521)                                       | <i>Acinetobacter baumannii</i> 6014059    | 341/341 (100%) |
| pNDM- BJ01_18 | 19241-18594           | 215        | resolvase (YP_001966417)                                                             | <i>Moraxella bovis</i> Epp63              | 126/205 (61%)  |
| pNDM- BJ01_19 | 19801-21513           | 570        | hypothetical protein (YP_025329)                                                     | <i>Pseudomonas alcaligenes</i>            | 125/207 (60%)  |
| pNDM- BJ01_20 | 21992-21510           | 160        | thermonuclease (ZP_06064599)                                                         | <i>Acinetobacter johnsonii</i> SH046      | 95/158 (60%)   |
| pNDM- BJ01_21 | 22653-22192           | 153        | hypothetical protein (ZP_05359512)                                                   | <i>Acinetobacter radioresistens</i> SK82  | 41/67 (61%)    |
| pNDM- BJ01_22 | 23357-22716           | 213        | Type IV secretion system protein (ZP_05359511)                                       | <i>Acinetobacter radioresistens</i> SK82  | 204/213 (96%)  |
| pNDM- BJ01_23 | 26065-23354           | 903        | putative type IV secretion system protein VirB4 (ZP_05359510)                        | <i>Acinetobacter radioresistens</i> SK82  | 818/903 (91%)  |

Table S2. Continued

| ORF No.       | Location (start-stop) | Size (aa.) | Best match (accession no.)                                 | Organism                                  | Similarity (%) |
|---------------|-----------------------|------------|------------------------------------------------------------|-------------------------------------------|----------------|
| pNDM- BJ01_24 | 27097-26381           | 238        | soluble lytic murein transglycosylase (ZP_05359508)        | <i>Acinetobacter radioresistens</i> SK82  | 201/240 (84%)  |
| pNDM- BJ01_25 | 28872-27355           | 505        | conserved hypothetical protein (ZP_05359506)               | <i>Acinetobacter radioresistens</i> SK82  | 467/502 (93%)  |
| pNDM- BJ01_26 | 30122-28869           | 417        | putative transglycosylase (ZP_05359505)                    | <i>Acinetobacter radioresistens</i> SK82  | 391/415 (94%)  |
| pNDM- BJ01_27 | 30650-30198           | 150        | hypothetical protein (ZP_05359504)                         | <i>Acinetobacter radioresistens</i> SK82  | 132/152 (87%)  |
| pNDM- BJ01_28 | 31028-30654           | 124        | hypothetical protein (ZP_05359503)                         | <i>Acinetobacter radioresistens</i> SK82  | 89/98 (91%)    |
| pNDM- BJ01_29 | 31989-30952           | 345        | P-type DNA transfer ATPase VirB11 (ZP_05359502)            | <i>Acinetobacter radioresistens</i> SK82  | 312/341 (91%)  |
| pNDM- BJ01_30 | 33384-32005           | 459        | VirB10 protein (ZP_05359501)                               | <i>Acinetobacter radioresistens</i> SK82  | 393/462 (85%)  |
| pNDM- BJ01_31 | 34123-33386           | 245        | VirB9 protein (ZP_05359500)                                | <i>Acinetobacter radioresistens</i> SK82  | 232/245 (95%)  |
| pNDM- BJ01_32 | 34926-34138           | 262        | hypothetical protein (ZP_05359501)                         | <i>Acinetobacter radioresistens</i> SK82  | 226/262 (86%)  |
| pNDM- BJ01_33 | 36011-34926           | 361        | TrbL/VirB6 plasmid conjugal transfer protein (ZP_05359498) | <i>Acinetobacter radioresistens</i> SK82  | 321/361 (89%)  |
| pNDM- BJ01_34 | 36456-36019           | 145        | hypothetical protein (ZP_05359497)                         | <i>Acinetobacter radioresistens</i> SK82  | 106/122 (87%)  |
| pNDM- BJ01_35 | 36796-36425           | 123        | hypothetical protein (ZP_05359496)                         | <i>Acinetobacter radioresistens</i> SK82  | 100/118 (85%)  |
| pNDM- BJ01_36 | 38674-39363           | 229        | cobyrinic Acid a,c-diamide synthase (ZP_05359494)          | <i>Acinetobacter radioresistens</i> SK82  | 205/229 (90%)  |
| pNDM- BJ01_37 | 39360-39764           | 134        | hypothetical protein (ZP_05359493)                         | <i>Acinetobacter radioresistens</i> SK82  | 117/130 (90%)  |
| pNDM- BJ01_38 | 41433-40405           | 342        | hypothetical protein (ABS89902)                            | <i>Acinetobacter baumannii</i> ATCC 17978 | 235/388 (61%)  |
| pNDM- BJ01_39 | 41821-42126           | 101        | hypothetical protein (ZP_05359485)                         | <i>Acinetobacter radioresistens</i> SK82  | 68/99 (69%)    |
| pNDM- BJ01_40 | 42352-42747           | 131        | hypothetical protein                                       | -                                         | -              |
| pNDM- BJ01_41 | 43010-43651           | 213        | conserved hypothetical protein (ZP_05359484)               | <i>Acinetobacter radioresistens</i> SK82  | 136/199 (68%)  |
| pNDM- BJ01_42 | 43882-44355           | 157        | hypothetical protein (ZP_05359486)                         | <i>Acinetobacter radioresistens</i> SK82  | 116/156 (74%)  |
| pNDM- BJ01_43 | 44589-45416           | 275        | DNA primase TraC (ZP_07358230)                             | <i>Desulfovibrio</i> sp. 3_1_syn3         | 183/255 (72%)  |
| pNDM- BJ01_44 | 45478-45714           | 78         | Putative uncharacterized protein (ADX05351)                | <i>Acinetobacter baumannii</i> 1656-2     | 65/74 (88%)    |
| pNDM- BJ01_45 | 45875-46297           | 140        | hypothetical protein (ZP_05359483)                         | <i>Acinetobacter radioresistens</i> SK82  | 102/128 (80%)  |
| pNDM- BJ01_46 | 47274-46738           | 178        | hypothetical protein (ZP_05359482)                         | <i>Acinetobacter radioresistens</i> SK82  | 159/175 (91%)  |
